# Supplementary material
Source: PubMed Central journal article supplement (PMC11112214)
Supplement: sj-pdf-1-jfm-10.1177_1098612X15597967.pdf [file sj-pdf-1-jfm-10.1177_1098612X15597967.pdf]

Supplementary material. Degree of new methylene blue distribution on the surface of each nerve using a 4-point block.

| <b>The nerves / Case</b>                           | <b>1</b> | <b>2</b> | <b>3</b> | <b>4</b> | <b>5</b> | <b>6</b> |
|----------------------------------------------------|----------|----------|----------|----------|----------|----------|
| Superficial branches of radial nerve               | ○        | ○        | ○        | ○        | ○        | ○        |
| Dorsal branch of ulnar nerve                       | ○        | ±        | ○        | ±        | ○        | ○        |
| Median nerve                                       | ○        | ×        | ○        | ○        | ×        | ±        |
| Superficial branch of palmar branch of ulnar nerve | ○        | ○        | ○        | ○        | ○        | ○        |
| Deep branch of palmar branch of ulnar nerve        | ×        | ○        | ×        | ±        | ±        | ○        |

○, the nerve was stained sufficiently; ±, the nerve was partially stained (not sufficiently); ×, the nerve was not stained

We defined sufficient stain as full circumference stained.

It was revealed that all nerves of the above were not stained sufficiently in any limbs.
